# Supplementary material
Source: PubMed Central journal article supplement (PMC9434459)
Supplement: gbac057_suppl_supplementary_material.pdf [file gbac057_suppl_supplementary_material.pdf]

Appendix Table 1. Percentage Distributions of Characteristics for Persons Aged 50+ Who Divorced and Persons Who Remained Married in the Last 12 Months

|                                    | 2010     |         |     | 2019     |         |     | 2010 + 2019 |           |     |
|------------------------------------|----------|---------|-----|----------|---------|-----|-------------|-----------|-----|
|                                    | Divorced | Married |     | Divorced | Married |     | Divorced    | Married   |     |
| <i>Age group</i>                   |          |         | *** |          |         | *** |             |           | *** |
| 50-64                              | 82.42    | 63.25   |     | 74.85    | 56.51   |     | 78.45       | 59.64     |     |
| 65+ (reference category)           | 17.58    | 36.75   |     | 25.15    | 43.49   |     | 21.55       | 40.36     |     |
| <i>Marital biography</i>           |          |         |     |          |         |     |             |           |     |
| Marriage order                     |          |         | *** |          |         | *** |             |           | *** |
| First marriage                     | 49.77    | 69.74   |     | 54.53    | 69.34   |     | 52.27       | 69.52     |     |
| Higher order marriage              | 50.23    | 30.26   |     | 45.47    | 30.66   |     | 47.73       | 30.48     |     |
| Marital duration                   |          |         | *** |          |         | *** |             |           | *** |
| 0-9 years                          | 19.74    | 8.08    |     | 15.94    | 8.39    |     | 17.74       | 8.25      |     |
| 10-19 years                        | 21.03    | 12.01   |     | 18.79    | 11.97   |     | 19.85       | 11.99     |     |
| 20-29 years                        | 28.63    | 20.69   |     | 30.72    | 21.17   |     | 29.73       | 20.95     |     |
| 30-39 years                        | 20.17    | 26.16   |     | 21.65    | 25.57   |     | 20.95       | 25.85     |     |
| 40+ years                          | 10.43    | 33.06   |     | 12.90    | 32.89   |     | 11.72       | 32.97     |     |
| <i>Demographic characteristics</i> |          |         |     |          |         |     |             |           |     |
| Gender                             |          |         |     |          |         | *   |             |           | **  |
| Women                              | 49.02    | 47.71   |     | 50.10    | 48.41   |     | 49.59       | 48.09     |     |
| Men                                | 50.98    | 52.29   |     | 49.90    | 51.59   |     | 50.41       | 51.91     |     |
| Race and ethnicity                 |          |         | *** |          |         | *** |             |           | *** |
| White                              | 69.34    | 77.90   |     | 64.82    | 73.49   |     | 66.97       | 75.54     |     |
| Black                              | 15.17    | 7.37    |     | 14.25    | 7.83    |     | 14.69       | 7.62      |     |
| Hispanic                           | 9.70     | 8.58    |     | 13.81    | 11.13   |     | 11.85       | 9.94      |     |
| Asian                              | 3.54     | 4.73    |     | 5.09     | 6.01    |     | 4.35        | 5.42      |     |
| Others                             | 2.25     | 1.41    |     | 2.03     | 1.55    |     | 2.13        | 1.48      |     |
| <i>Economic resources</i>          |          |         |     |          |         |     |             |           |     |
| Education                          |          |         | *** |          |         | *** |             |           | *** |
| Less than high school              | 15.81    | 13.77   |     | 13.11    | 11.00   |     | 14.40       | 12.28     |     |
| High school graduate               | 28.83    | 30.13   |     | 29.22    | 27.86   |     | 29.04       | 28.91     |     |
| Some college                       | 30.94    | 27.28   |     | 30.58    | 27.81   |     | 30.75       | 27.57     |     |
| Bachelor's degree or more          | 24.41    | 28.82   |     | 27.09    | 33.33   |     | 25.82       | 31.24     |     |
| Employment                         |          |         | *** |          |         | *** |             |           | *** |
| Not in labor force                 | 30.34    | 44.12   |     | 34.00    | 46.39   |     | 32.26       | 45.33     |     |
| Unemployed                         | 8.54     | 4.01    |     | 3.57     | 1.39    |     | 5.93        | 2.61      |     |
| Worked part-time                   | 11.78    | 11.83   |     | 11.85    | 11.69   |     | 11.81       | 11.76     |     |
| Worked full-time                   | 49.34    | 40.04   |     | 50.58    | 40.53   |     | 49.99       | 40.30     |     |
| Personal income                    |          |         | **  |          |         | *** |             |           | *** |
| < 10K                              | 20.74    | 22.94   |     | 16.70    | 18.36   |     | 18.62       | 20.49     |     |
| 10-25K                             | 26.41    | 25.12   |     | 22.15    | 21.42   |     | 24.17       | 23.14     |     |
| 25-40K                             | 17.55    | 16.55   |     | 18.10    | 15.49   |     | 17.84       | 15.98     |     |
| 40-55K                             | 12.28    | 11.89   |     | 13.04    | 12.26   |     | 12.68       | 12.09     |     |
| 55-70K                             | 7.50     | 7.19    |     | 8.03     | 8.35    |     | 7.78        | 7.81      |     |
| > 70K                              | 15.52    | 16.31   |     | 21.97    | 24.12   |     | 18.91       | 20.49     |     |
| Unweighted N <sup>a</sup>          | 6,770    | 751,063 |     | 7,643    | 885,064 |     | 14,413      | 1,636,127 |     |

Source: American Community Survey, 2010 and 2019

Note: Column total may not sum to 100% because of rounding error.

\*  $p < .05$  \*\*  $p < .01$  \*\*\*  $p < .001$

Appendix Table 2. Odds Ratios from Logistic Regressions of the Likelihood of Gray Divorce in the Last 12 Months (Three Category Age Group Measure)

|                                           |                  |     |
|-------------------------------------------|------------------|-----|
| <i>Survey year</i>                        |                  |     |
| 2010 (reference category)                 |                  |     |
| 2019                                      | 1.023            |     |
| <i>Age group</i>                          |                  |     |
| 50-64                                     | 1.478            | *** |
| 65-74 (reference category)                |                  |     |
| 75+                                       | 0.829            | *** |
| <i>Marital biography</i>                  |                  |     |
| Marriage order                            |                  |     |
| First marriage (reference category)       |                  |     |
| Higher order marriage                     | 1.407            | *** |
| Marital duration                          |                  |     |
| 0-9 years                                 | 3.265            | *** |
| 10-19 years                               | 2.665            | *** |
| 20-29 years                               | 2.573            | *** |
| 30-39 years                               | 1.593            | *** |
| 40+ years (reference category)            |                  |     |
| <i>Demographic characteristics</i>        |                  |     |
| Gender                                    |                  |     |
| Women                                     | 1.107            | *** |
| Men (reference category)                  |                  |     |
| Race and ethnicity                        |                  |     |
| White (reference category)                |                  |     |
| Black                                     | 1.764            | *** |
| Hispanic                                  | 1.101            | *   |
| Asian                                     | 0.909            |     |
| Others                                    | 1.357            | *** |
| <i>Economic resources</i>                 |                  |     |
| Education                                 |                  |     |
| Less than high school                     | 1.233            | *** |
| High school graduate (reference category) |                  |     |
| Some college                              | 1.025            |     |
| Bachelor's degree or more                 | 0.851            | *** |
| Employment                                |                  |     |
| Not in labor force (reference category)   |                  |     |
| Unemployed                                | 1.904            | *** |
| Worked part-time                          | 1.071            |     |
| Worked full-time                          | 1.145            | *** |
| Personal income                           |                  |     |
| < 10K                                     | 1.035            |     |
| 10-25K                                    | 1.230            | *** |
| 25-40K                                    | 1.195            | *** |
| 40-55K                                    | 1.084            | *   |
| 55-70K                                    | 1.032            |     |
| > 70K (reference category)                |                  |     |
| Constant                                  | 0.003            | *** |
| Unweighted N                              | 1,650,540        |     |
|                                           | F(24, 56)=138.73 |     |

Source: American Community Survey, 2010 and 2019

\*  $p < .05$  \*\*  $p < .01$  \*\*\*  $p < .001$
